# Supplementary material
Source: publisher site journal article supplement (https://vertebrate-zoology.arphahub.com/article/89324/download/suppl/31/)
Supplement: Supplementary file 1

Narayanan S, Aravind NA (2022) A new species of rupicolous *Cnemaspis* Strauch, 1887 (Squamata: Gekkonidae) from the Biligirirangan Hills of Southern India. Vertebrate Zoology 72 (2022)

**Table S1.** List of sequences and Genbank accession numbers used in this study.

| **Species** | **Voucher** | **16S** | **ND2** | **Locality** |
| --- | --- | --- | --- | --- |
| *Cnemaspis adii* | BNHS2494 & BNHS2465 | KX753655 | MT188142 | India, Karnataka, Ballari District, Hampi |
| *Cnemaspis agarwali* | AK 107 | - | MK792466 | India, Tamil Nadu, Salem District, Sankari |
| *Cnemaspis ajijae* | CESL891 | MZ291571 | MZ701830 | India, Maharashtra, Satara District, Mahabaleshwar |
| *Cnemaspis alwisi* | AMB7447 | - | KY037997 | Sri Lanka, Anuradhapura District, Ritigala |
| *Cnemaspis amba* | VG 408 | - | MK792488 | India, Maharashtra, Kolhapur District, Amba |
| *Cnemaspis amboliensis* | VG 394 & BNHS 2505 | MH174355 | MK792481 | India, Maharashtra, Sindhudurg District, Amboli |
| *Cnemaspis anaikattiensis* | CESL612 | MZ291572 | MZ701821 | Attapadi, Palakkad, Kerala, India |
| *Cnemaspis anaimudiensis* | CESL232 | MZ291574 | MZ701805 | Idukki, Kerala, India |
| *Cnemaspis anandani* | CESL297 | MZ291576 | MZ701811 |  |
| *Cnemaspis australis* | ZM003 | MZ291570 | MZ701834 |  |
| *Cnemaspis balerion* | BNHS 2623 | MZ291580 | MZ701815 | Kemmangundi, |
| *Cnemaspis bangara* | BNHS 2584 (AK 292) | - | MT188143 | India, Karnataka, Kolar District, Paparajanahalli |
| *Cnemaspis beddomei* | CESL379 | MZ291581 | MZ701814 | Kalakkad Mundanthurai TR, Tamil Nadu, India |
| *Cnemaspis butewai* | NMSL 2019.07.01 | - | MK562351 | Sri Lanka, Ratnapura District, Bambarabotuwa |
| *Cnemaspis* cf. *flavigularis* | ZM002 | MZ291569 | MZ701833 | Idukki, Kerala, India |
| *Cnemaspis* cf. *gracilis* | AK 212 | - | MK792463 | India, Tamil Nadu, Salem District, Yercaud |
| *Cnemaspis chengodumalaensis* | CESL624 | MZ291584 | MZ701822 | Kozhikode, Kerala, India |
| *Cnemaspis flaviventralis* | CESL677 | MZ291588 | MZ701824 |  |
| *Cnemaspis galaxia* | CESL511 | MZ291589 | MZ701818 |  |
| *Cnemaspis gemunu* | AMB7495 | - | KY037998 | Sri Lanka, Nuwara Eliya District, Hakgala |
| *Cnemaspis girii* | AK 439 & VG2080 | MZ291590 | MK792491 | India, Maharashtra, Satara District, Kaas Plateau |
| *Cnemaspis goaensis* | CESL805 | MZ291592 | MZ701826 | India, Maharashtra, Uttara Kannada District, Gund |
| *Cnemaspis gotaimbarai* | NMSL 2019.04.01 | - | MK562364 | Sri Lanka, Ampara District, Kokagala |
| *Cnemaspis gracilis* | CESL607 | MZ291594 | MZ701820 | India, Kerala, Palakkad District, near Chittur River |
| *Cnemaspis graniticola* | BNHS 2589 (CESL839) | MZ291595 | MT188145 | India, Andhra Pradesh, Chittoor District, Horsley hills |
| *Cnemaspis heteropholis* | CESL693 | MZ291596 | MT180436 | India, Karnataka, Hassan District, Sakleshpur |
| *Cnemaspis hitihami* | WHT 5918 | - | KY038012 | Sri Lanka, Moneragala District, Kumaradola estate |
| *Cnemaspis indica* | CESL291 | MZ291597 | MZ701810 | Nilgiris, Tamil Nadu, India |
| *Cnemaspis ingerorum* | WHT 7331 | - | KY037990 | Sri Lanka, Hambantota District, Sandagala |
| *Cnemaspis kallima* | AA82 | - | KY037970 | Sri Lanka, Matale District, Rattota, Gammaduwa |
| *Cnemaspis kandiana* | AA57 | - | KY037971 | Sri Lanka, Kandy District, Gannoruwa |
| *Cnemaspis kivulegedarai* | NMSL 2019.08.01 | - | MK562348 | Sri Lanka, Nuwara Eliya District, Walapane |
| *Cnemaspis kohukumburai* | NMSL 2019.05.01 | - | MK562336 | Sri Lanka, Kandy District, Kadugannawa |
| *Cnemaspis kolhapurensis* | CESL868 | MZ291599 | MZ701829 | India, Maharashtra, Kolhapur District, Dajipur |
| *Cnemaspis kottiyoorensis* | BNHS 2519 | MH174363 |  | Kannur, Kerala, India |
| *Cnemaspis koynaensis* | CES G349 | - | MK792490 | India, Maharashtra, Satara District, Humbarli |
| *Cnemaspis kumarasinghei* | AMB7431 | - | KY037974 | Sri Lanka, Moneragala District, Rathataakanda (Buttala) |
| *Cnemaspis latha* | AA05 | - | KY037976 | Sri Lanka, Nuwara Eliya District, Bandarawela |
| *Cnemaspis limayei* | AK 362 | - | MK792482 | India, Maharashtra, Kolhapur District, Dajipur |
| *Cnemaspis lithophilis* | BNHS 2625 | MZ291602 | MZ701827 | Mookambika, Udupi, Karnataka, India |
| *Cnemaspis littoralis* | BNHS 2518 | MH174368 | MZ701831 | Kozhikode, Kerala, India |
| *Cnemaspis mahabali* | AK 398 & CESL859 | MZ291604 | MK792492 | India, Maharashtra, Raigad District, Phansad |
| *Cnemaspis modigliani* | MVZ239314 | - | KY037977 | Sumatra, Kecamatan Enggano, Pulau Enggano, near Malakoni |
| *Cnemaspis monticola* | CESL044 | MZ291605 | MZ701803 | Manikunjmalai, Wayanad, Kerala, India |
| *Cnemaspis mysoriensis* | CESL557 | MZ291606 | MZ701819 | India, Karnataka, Bangalore |
| *Cnemaspis nairi* | CESL715 | MZ291608 |  | Thenmala, near Shendurney, Kerala, India |
| *Cnemaspis nandimithrai* | NMSL 2019.03.01 | - | MK562362 | Sri Lanka, Ampara District, Kudumbigala |
| *Cnemaspis nilgala* | AMB 7418 | - | KY038009 | Sri Lanka, Moneragala District, Serawa |
| *Cnemaspis nimbus* | CESL252 | MZ291612 | MZ701807 | Mathikettan Shola NP, Idukki, Kerala, India |
| *Cnemaspis otai* | BNHS 2512 & AK668 | MH174362 | MT188146 | India, Tamil Nadu, Vellore district, Vellore Fort |
| *Cnemaspis palakkadensis* | BNHS 2790 | MT762366 |  | Palakkad, Kerala, India |
| *Cnemaspis palanica* | CESL276 | MZ291614 | MZ701812 |  |
| *Cnemaspis pava* | AMB 7494 | - | KY037980 | Sri Lanka, Nuwara Eliya District, Labookellie |
| *Cnemaspis phillipsi* | AA 81 | - | KY038001 | Sri Lanka, Matale District, Rattota, Gammaduwa |
| *Cnemaspis podihuna* | 58A | - | KY038005 | Sri Lanka, Moneragala District, Kukulagoda |
| *Cnemaspis punctata* | AA80 | - | KY038007 | Sri Lanka, Matale District, Rattota, Gammaduwa |
| *Cnemaspis regalis* | CESL487 | MZ291615 | MZ701816 | Kalakkad Mundanthurai TR, Tamil Nadu, India |
| *Cnemaspis retigalensis* | AMB 7448 | - | AMB 7448 | Sri Lanka, Anuradhapura District, Mihintale |
| *Cnemaspis rishivalleyensis* | AK659 | - | MT773218 | Rishi Valley School, Chittoor, Andhra Pradesh, India |
| *Cnemaspis rubraoculus* | CESL114 | MZ291616 |  | Upper Manalar, Periyar Tiger Reserve, Kerala, India |
| *Cnemaspis sakleshpurensis* | AK 862 (BNHS 2814) | - | OK424588 | India, Karnataka, Hassan District, Sakleshpur |
| *Cnemaspis samanalensis* | AMB 7505 | - | KY037983 | Sri Lanka, Nuwara Eliya District, Upcot tea estate |
| *Cnemaspis scalpensis* | AA47 | - | KY038008 | Sri Lanka, Kandy District, Gannoruwa |
| *Cnemaspis shevaroyensis* | NCBS-BH674 (AK 204) | - | MK792468 | India, Tamil Nadu, Salem District, Yercaud |
| *Cnemaspis silvula* | AA88 | - | KY037984 | Sri Lanka, Galle District, Hiyare Forest Reserve |
| *Cnemaspis sisparensis* | CESL136 | MZ291617 | MZ701801 | Silent Valley NP, Palakkad, Kerala, India |
| *Cnemaspis smaug* | CESL251 | MZ291618 | MZ701806 | Mathikettan Shola NP, Idukki, Kerala, India |
| *Cnemaspis* sp. | unvouchered | - | MK792502 | India, Kerala |
| *Cnemaspis* sp. | AA 17 | - | KY037989 | Sri Lanka, Matara District, Naotunna (near Thalalla) |
| *Cnemaspis* sp. | AA 87 | - | KY037993 | Sri Lanka, Badulla District, Haputale |
| *Cnemaspis* sp. | SB 048 | - | KY037995 | India, Karnataka, Kodagu District, Kumarahalli |
| *Cnemaspis* sp. | 47 A | - | KY038011 | Sri Lanka, Moneragala District, Maligathenna |
| *Cnemaspis* sp. | SB 151 | - | KY038013 | India, Kerala, Thrissur District, Athirappilly Falls |
| *Cnemaspis* sp. | AMB 7508 | - | KY037991 | Sri Lanka, Ratnapura District, Masimbula, Godakawela |
| *Cnemaspis stellapulvis* | AK846 | - | MT773215 | Yadiyur, Mandya, Karnataka, India |
| *Cnemaspis tanintharyi* | USNM 587514 | - | MN104944 | Myanmar, Tanintharyi Region, 28 km from Bokpyin town, near Payarhtan Cave |
| *Cnemaspis thackerayi* | CES G143 | - | MK792471 | India, Tamil Nadu, Salem District, Yercaud |
| *Cnemaspis thayawthadangyi* | USNM 595052 | - | MN104950 | Myanmar, Tanintharyi Region, Myeik Archipelago, southeast side of Linn Lune Kyun |
| *Cnemaspis tigris* | AK 884 (NRC-AA-1160) | - | OK424591 | India, Karnataka, Chickballapur, Kaiwara |
| *Cnemaspis tigris* | AK 885 (NRC-AA-1159) | - | OK424590 | India, Karnataka, Chickballapur, Kaiwara |
| *Cnemaspis umashaankeri* **sp. nov.** | ZSI-R-28301 | OP353630 | OP358454 | India, Karnataka, BR Hills. |
| *Cnemaspis umashaankeri* **sp. nov.** | BNHS 3127 | OP353631 | OP358455 | India, Karnataka, BR Hills. |
| *Cnemaspis upendrai* | AA83 | - | KY037986 | Sri Lanka, Kandy District, Pussellawa |
| *Cnemaspis vijayae* | AK R 836 (NRC-AA-1185) | - | OM160944 | India, Karnataka, Kodagu District, Honey Valley Estate |
| *Cnemaspis wallaceii* | CESL377 | MZ291619 | MZ701813 | Andiparai Shola, Anamalai, Tamil Nadu, India |
| *Cnemaspis wynadensis* |  | MZ291620 | MZ701823 | Wayanad, Kerala, India |
| *Cnemaspis yelagiriensis* | NCBS-BH693 (AK 828) | - | MT188147 | India, Tamil Nadu, Vellore District, Yelagiri hills |
| *Cnemaspis yercaudensis* | BNHS 2510 & CES G133 | MH174360 | MK792473 | India, Tamil Nadu, Salem District, Yercaud |
| *Cnemaspis zacharyi* | BNHS 2737 | MT217040 | MZ701832 | Lakkadi, Wayanad, Kerala, India |
